# 1 Allele specific expression and methylation 2 in the bumblebee, *Bombus terrestris*

3 Zoë N. Lonsdale<sup>1</sup>, Kate D. Lee<sup>2</sup>, Maria Kyriakidou<sup>1</sup>, Harindra E.  
4 Amarasinghe<sup>3</sup>, Despina Nathanael<sup>1</sup>, and Eamonn B. Mallon<sup>1</sup>

5 <sup>1</sup>Department of Genetics and Genome Biology, University of Leicester, Leicester, U.K.

6 <sup>2</sup>Bioinformatics and Biostatistics Support Hub (B/BASH), University of Leicester,  
7 Leicester, U.K.

8 <sup>3</sup>Academic Unit of Cancer Sciences, University of Southampton, Southampton, U.K.

9 Corresponding author:

10 Eamonn B. Mallon<sup>1</sup>

11 Email address: [ebm3@le.ac.uk](mailto:ebm3@le.ac.uk)

## 12 ABSTRACT

13 The social hymenoptera are emerging as models for epigenetics. DNA methylation, the addition of a  
14 methyl group, is a common epigenetic marker. In mammals and flowering plants methylation affects  
15 allele specific expression. There is contradictory evidence for the role of methylation on allele specific  
16 expression in social insects. The aim of this paper is to investigate allele specific expression and  
17 monoallelic methylation in the bumblebee, *Bombus terrestris*. We found nineteen genes that were both  
18 monoallelically methylated and monoallelically expressed in a single bee. A number of these genes are  
19 involved in reproduction. Fourteen of these genes express the hypermethylated allele, while the other  
20 five express the hypomethylated allele. We also searched for allele specific expression in twenty-nine  
21 published RNA-seq libraries. We found 555 loci with allele-specific expression. Genomic imprinting in  
22 mammals often involves monoallelic methylation and expression. It is tempting to associate our results  
23 with genomic imprinting, especially as a number of the genes discovered are exactly the type predicted  
24 by theory to be imprinted. Caution however should be applied due to the lack of understanding of the  
25 functional role of methylation in gene expression in insects and in the, as yet unquantified, role of genetic  
26 cis effects in insect allele specific methylation and expression.

## 27 INTRODUCTION

28 Epigenetics is the study of heritable changes in gene expression that do not involve changes to the  
29 underlying DNA sequence (Goldberg et al., 2007). Social hymenoptera (ants, bees, and wasps) are  
30 important emerging models for epigenetics (Glastad et al., 2011; Weiner and Toth, 2012; Welch and Lister,  
31 2014; Yan et al., 2014). This is due to theoretical predictions for a role for an epigenetic phenomenon,  
32 genomic imprinting (parent of origin allele specific expression), in their social organisation (Queller,  
33 2003), the recent discovery of parent-of-origin allele specific expression in honeybees (Galbraith et al.,  
34 2016), and data showing a fundamental role in social insect biology for DNA methylation, an epigenetic  
35 marker (Chittka et al., 2012).

36 In mammals and flowering plants, allele specific expression is often associated with methylation  
37 marks passed from parents to offspring (Reik and Walter, 2001). However DNA methylation is involved  
38 in numerous other cellular processes (Bird, 2002). There is contradictory evidence for the role of  
39 methylation on allele specific expression in social insects. Methylation is associated with allele specific  
40 expression in a number of loci in the ants *Camponotus floridanus* and *Harpegnathos saltator* (Bonasio  
41 et al., 2012). Recently, we found evidence for allele specific expression in bumblebee worker reproduction  
42 genes (Amarasinghe et al., 2015) and that methylation is important in bumblebee worker reproduction  
43 (Amarasinghe et al., 2014). However, other work on the honeybee *Apis mellifera* found no link between  
44 genes showing allele specific expression and known methylation sites in that species (Kocher et al., 2015).

45 The presence of allele specific expression does not necessarily mean an epigenetic process is involved.  
46 Allele specific expression is known to be caused by a number of genetic as well as epigenetic processes

47 (Palacios et al., 2009). The genetic process usually involves cis effects such as transcription factor binding  
48 sites, or less often, untranslated regions which alter RNA stability or microRNA binding (Farh et al.,  
49 2005).

50 The aim of this paper is to investigate allele specific expression and methylation in the bumblebee,  
51 *Bombus terrestris*. The recently sequenced genome of the bumblebee, *Bombus terrestris* displays a full  
52 complement of genes involved in the methylation system (Sadd et al., 2015). An extreme form of allele  
53 specific expression involves monoallelic expression, where one allele is completely silenced. In the  
54 canonical mammal and flowering plant systems, this is often associated with monoallelic methylation.  
55 In this paper, we examined the link between monoallelic methylation and monoallelic expression in the  
56 bumblebee, *Bombus terrestris*, by examining two whole methylome libraries and an RNA-seq library  
57 from the same bee. MeDIP-seq is an immunoprecipitation technique that creates libraries enriched for  
58 methylated cytosines (Harris et al., 2010). Methyl-sensitive restriction enzymes can create libraries that  
59 are enriched for non-methylated cytosines (MRE-seq) (Harris et al., 2010). Genes found in both libraries  
60 are monoallelically methylated, with the hypermethylated allele being in the MeDIP-seq data and the  
61 hypomethylated allele in the MRE-seq data (Harris et al., 2010). Monoallelic expression was identified in  
62 these loci from the RNA-seq library. If only one allele was expressed then we knew that these loci were  
63 both monoallelically methylated and monoallelically expressed in this bee. We confirmed this monoallelic  
64 expression in one locus using qPCR.

65 We then more generally searched for allele specific expression by analysing twenty nine published  
66 RNA-seq libraries from worker bumblebees (Harrison et al., 2015; Riddell et al., 2014). We identified  
67 heterozygotes in the RNA-seq libraries and measured the expression of each allele. We then identified  
68 loci that showed significant expression differences between their two alleles.

## 69 MATERIALS AND METHODS

### 70 Samples

71 Data from twenty-nine RNA-seq libraries were used for the allele specific expression analysis (six from  
72 Harrison *et al.* (Harrison et al., 2015), and twenty-three from Riddell *et al.* (Riddell et al., 2014).  
73 The Riddell bees came from two colonies, one commercially reared bumblebee colony from Koppert  
74 Biological Systems U.K. and one colony from a wild caught queen from the botanic gardens, Leicester.  
75 The Harrison bees were from three commercially reared colonies obtained from Agralan Ltd. A Koppert  
76 colony worker bee was used for the MeDIP-seq / MRE-seq / RNA-seq experiment. Bees from three  
77 different Koppert colonies were used for the qPCR analysis. Samples are outlined in Table 1. Colonies  
78 were fed *ad libitum* with pollen (Percie du sert, France) and 50 % diluted glucose/fructose mix (Meliose –  
79 Roquette, France). Before and during the experiments colonies were kept at 26°C and 60% humidity in  
80 constant red light.

**Table 1. Bees used in each experiment.** K refers to Koppert, A to Agralan and Q to the wild caught Leicester queen.

| Experiment                            | Number | Colony |
|---------------------------------------|--------|--------|
| Allele specific expression<br>RNA-seq | 1      | A1     |
|                                       | 2      | A2     |
|                                       | 2      | A3     |
|                                       | 1      | A4     |
|                                       | 14     | K1     |
|                                       | 9      | Q1     |
| MeDip/MRE/RNA-seq                     | 1      | K2     |
| qPCR                                  | 2      | K3     |
|                                       | 1      | K4     |
|                                       | 1      | K5     |

## 81 **Next generation sequencing**

### 82 ***MeDIP-seq, MRE-seq and RNA-seq***

83 RNA and DNA was extracted from a single five day old whole bee (Colony K2). DNA was extracted  
84 using an ethanol precipitation method. Total RNA was extracted using Tri-reagent (Sigma-Aldrich, UK).

85 Three libraries were prepared from this bee by Eurofins genomics. These were MeDIP-seq and  
86 MRE-seq libraries on the DNA sample and one amplified short insert cDNA library with size of 150-  
87 400 bp on the RNA sample. Both the MeDIP-seq and MRE-seq library preparations are based on  
88 previously published protocols (Harris et al., 2010). MeDIP-seq uses monoclonal antibodies against  
89 5-methylcytosine to enrich for methylated DNA independent of DNA sequence. MRE-seq enriches  
90 for unmethylated cytosines by using methylation-sensitive enzymes that cut only restriction sites with  
91 unmethylated CpGs. Each library was individually indexed. Sequencing was performed on an Illumina  
92 HiSeq®2000 instrument (Illumina, Inc.) by the manufacturer's protocol. Multiplexed 100 base paired-  
93 read runs were carried out yielding 9390 Mbp for the MeDIP-seq library, 11597 Mbp for the MRE-seq  
94 library and 8638 Mbp for the RNA-seq library.

### 95 ***Previously published RNA-seq***

96 Full details of the RNA-seq protocols used have been published previously (Harrison et al., 2015;  
97 Riddell et al., 2014). Briefly, for the Riddell bees, total RNA was extracted from twenty three individual  
98 homogenised abdomens using Tri-reagent (Sigma-Aldrich, UK). TruSeq RNA-seq libraries were made  
99 from the 23 samples at NBAF Edinburgh. Multiplexed 50 base single-read runs was performed on an  
100 Illumina HiSeq®2000 instrument (Illumina, Inc.) by the manufacturer's protocol. For the Harrison  
101 bees, total RNA was extracted from whole bodies using a GenElute Mammalian Total RNA Miniprep kit  
102 (Sigma-Aldrich) following the manufacturers' protocol. The six libraries were sequenced as multiplexed  
103 50 base single-read runs on an Illumina HiSeq 2500 system in rapid mode at the Edinburgh Genomics  
104 facility of the University of Edinburgh.

## 105 **Monoallelic methylation and expression - Bioinformatic analysis**

106 We searched for genes that were monoallelically methylated (present in both MeDip-seq and MRE-seq  
107 libraries), heterozygous (different alleles in the methylation libraries) and monoallelically expressed (only  
108 one allele present in the RNA-seq library).

### 109 ***Alignment and bam refinement***

110 mRNA reads were aligned to the *Bombus terrestris* genome assembly (AELG00000000) using Tophat  
111 (Kim et al., 2013) and converted to bam files with Samtools (Li et al., 2009). Reads were labelled with  
112 the AddOrReplaceReadGroups.jar utility in Picard (<http://picard.sourceforge.net/>). The MRE-seq and  
113 MeDIP-seq reads were aligned to the genome using BWA mapper (Li and Durbin, 2009). The resultant  
114 sam alignments were soft-clipped with the CleanSam.jar utility in Picard and converted to bam format  
115 with Samtools. The Picard utility AddOrReplaceReadGroups.jar was used to label the MRE and MeDIP  
116 reads which were then locally re-aligned with GATK (DePristo et al., 2011; McKenna et al., 2010). PCR  
117 duplicates for all bams (mRNA, MeDIP and MRE) were marked with the Picard utility Markduplicates.jar.

### 118 ***Identifying regions of interest and integrating data***

119 Coverage of each data type was calculated using GATK DepthofCoverage (McKenna et al., 2010). Only  
120 regions with a read depth of at least six in each of the libraries (RNA-seq, MeDIP-seq and MRE-seq) was  
121 used. Heterozygotes were identified using Samtools mpileup and bcftools on each data set separately (Li  
122 and Durbin, 2009) and results were merged with vcf tools (Danecek et al., 2011). Regions of mRNA with  
123 overlaps of MeDIP, MRE, and monoallelic snps were identified with custom perl scripts.

## 124 **Allele specific expression - Bioinformatic analysis**

125 We created a pipeline to search for heterozygous loci that show allele specific expression and identify the  
126 associated enriched gene ontology (GO) terms in twenty-nine previously published RNA-seq libraries  
127 (Harrison et al., 2015; Riddell et al., 2014).

128 Each RNA library was mapped to the *Bombus terrestris* reference genome (Bter 1.0, accession  
129 AELG00000000.1) (Sadd et al., 2015) using the BWA mapper (Li and Durbin, 2009). The mean GC  
130 content of the 29 libraries was 42.34%, with individual libraries having a similar GC content ranging from  
131 40-46%. GC content differed with run (Nested ANOVA:  $F = 20.302$ ,  $df = 1$ ,  $p < 0.001$ ), but not by colony  
132 (Nested ANOVA:  $F = 1.763$ ,  $df = 4$ ,  $p = 0.171$ ). The mean coverage of the 29 libraries was 13.29, with

133 mean library coverage ranging from 9.84 to 17.61. Run had an effect on coverage (Nested ANOVA:  $F =$   
134  $7.554$ ,  $df = 1$ ,  $p = 0.011$ ), as did colony (Nested ANOVA:  $F = 6.962$ ,  $df = 4$ ,  $p < 0.001$ ).

135 Therefore, the combat method in the R package SVA (version 3.20.0) was used to remove any batch  
136 effects and control for original differences in coverage (Leek et al., 2012; Johnson et al., 2007). The  
137 success of this control was confirmed by the R package edgeR (version 3.14.0) (McCarthy et al., 2012;  
138 Robinson et al., 2010). The SVA adjustment reduced the edgeR dispersion value from 3.9994 (BCV=2) to  
139 0 (BCV=0.0003) (supplementary figure 1).

140 Bcftools (version 0.1.19-44428cd), bedtools (version 2.17.0), and samtools (version 0.1.19-44428cd)  
141 were used to prepare the RNA libraries and call the SNPs, before the SNPs were filtered based on mapping  
142 quality score (Quinlan and Hall, 2010; Li and Durbin, 2009). Only SNPs with a mapping quality score  
143 of  $p < 0.05$  and a read depth of  $\geq 6$  were included in the analyses. The R package, QuASAR, was then  
144 used to identify genotypes (according to the Hardy-Weinberg equilibrium) and locate any allele specific  
145 expression at heterozygous sites (Harvey et al., 2014). QuASAR removes snps with extreme differential  
146 allele expression from the analyses, thus controlling for any base-calling errors. Sequence regions (the  
147 snp position +/- 2900bp), encompassing the loci identified as showing ASE in at least three of the thirty  
148 libraries, were compared to *Drosophila melanogaster* proteins (non-redundant (nr) database) with Blastx  
149 (Altschul et al., 1997). The blast results were annotated using Blast2Go (Gotz et al., 2008). Fisher's exact  
150 test was implemented to identify enriched GO terms, which were then visualised using REVIGO (Supek  
151 et al., 2011). To identify which bumblebee genes the snps were located in, the snp position +/- 25 bp was  
152 compared against the *Bombus terrestris* genome (Sadd et al., 2015) using Blastn.

### 153 Candidate gene allele specific qPCR

154 DNA was extracted from four bees from three Koppert colonies using the Qiagen DNA Micro kit according  
155 to manufacturer's instructions. RNA was extracted from samples of the heads of the same worker bees  
156 with the QIAGEN RNeasy Mini Kit according to manufacturer's instructions. cDNA was synthesized from  
157 a 8  $\mu$ l sample of RNA using the Tetro cDNA synthesis Kit (Bioline) as per manufacturer's instructions.

158 We amplified numerous fragments of the 19 candidate genes. Sanger sequencing results were analyzed  
159 using the heterozygote analysis module in Geneious version 7.3.0 to identify heterozygotic nucleotide  
160 positions. It was difficult to identify snps in exonic regions of the 19 loci, which could be amplified with  
161 primers of suitable efficiency. We managed to identify a suitable region in *slit homolog 2 protein-like*  
162 (AELG01000623.1 exonic region 1838-2420).

163 The locus was run for 3 different reactions; T allele, G allele and reference. Reference primers were de-  
164 signed according to Gineikiene et al. (2009). A common reverse primer (CTGGTTCCCGTCCAATCTAA)  
165 was used for all three reactions. A reference forward primer (CGTGTCCAGAATCGACAATG) was  
166 designed to the same target heterozygote sequence, upstream of the heterozygote nucleotide position. The  
167 reference primers measure the total expression of the gene, whereas the allele specific primers (T allele:  
168 CCAGAATCGACAATGACTCGT, G allele: CAGAATCGACAATGACTCGG) measure the amount of  
169 expression due to the allele. Thus the ratio between the allele specific expression and reference locus  
170 expression would be the relative expression due to the allele.

171 Three replicate samples were run for each reaction. All reactions were prepared by the Corbett  
172 robotics machine, in 96 well qPCR plates (Thermo Scientific, UK). The qPCR reaction mix (20  $\mu$ l) was  
173 composed of 1  $\mu$ l of diluted cDNA (50ng/  $\mu$ l), 1  $\mu$ l of forward and reverse primer (5  $\mu$ M/  $\mu$ l each), 10  $\mu$ l  
174 2X SYBR Green JumpStart Taq ReadyMix (Sigma Aldrich, UK) and 7  $\mu$ l ddH<sub>2</sub>O. Samples were run in a  
175 PTC-200 MJ thermocycler. The qPCR profile was; 4 minutes at 95°C denaturation followed by 40 cycles  
176 of 30s at 95°C, 30s at 59°C and 30s at 72°C and a final extension of 5 minutes at 72°C.

177 Forward primers are different, both in their terminal base (to match the snp) and in their length. It is  
178 entirely possible that they may amplify more or less efficiently even if there was no difference in amount  
179 of template (Pfaffl, 2001). To test for this we repeated all qPCRs with genomic DNA (1  $\mu$ l of diluted  
180 DNA (20ng/  $\mu$ l) from the same bees as the template. We would expect equal amounts of each allele in the  
181 genomic DNA. We also measured efficiency of each reaction as per Liu and Saint (2002).

182 Median  $C_t$  was calculated for each set of three technical replicates. A measure of relative expression  
183 (ratio) was calculated for each allele in each worker bee as follows:

$$184 \text{ratio}_{\text{allele}} = \frac{E_{\text{allele}}^{-C_{\text{allele}}}}{E_{\text{reference}}^{-C_{\text{reference}}}} \quad (1)$$

184 E is the median efficiency of each primer set (Liu and Saint, 2002; Pfaffl, 2001). All statistical analysis  
185 was carried out using R (3.1.0) (Team, 2015).

## 186 Data Availability

187 All sequence data for this study are archived at European Nucleotide Archive (ENA); Accession no.  
188 PRJEB9366 (<http://www.ebi.ac.uk/ena/data/view/PRJEB9366>), x, x. GO-analysis results and lists of  
189 differentially expressed transcripts are available as Supporting Information.

## 190 RESULTS

191 In total, we found nineteen genes that were both monoallelically methylated (present in both Me-DIP  
192 and MRE-seq libraries) and monoallelically expressed (only one allele present in the RNA-seq library).  
193 Of the nineteen genes, fourteen had the hypermethylated (MeDIP) allele expressed, while five had the  
194 hypomethylated (MRE-seq) allele expressed (see supplementary table 1).

195 Monoallelic expression was confirmed in one of these nineteen (*slit homolog 2 protein-like*  
196 (AELG01000623.1)) by allele specific qPCR (Amarasinghe et al., 2015). The allele with a guanine  
197 at the snp position had a mean expression of  $6.04 \pm 8.28$  (standard deviation) in four bees from three  
198 different colonies. The thymine allele was not expressed at all in these bees. This was not due to the effi-  
199 ciency of the primers as the DNA controls of both alleles showed similar amplification (G mean =  $422.70$   
200  $\pm 507.36$ , T mean =  $1575.17 \pm 503.02$ ). In the three other loci tested (*Ras GTPase-activating protein 1*,  
201 *Ecdysone receptor*, *methionine aminopeptidase 1-like*) we found apparent monoallelic expression, but  
202 could not dismiss primer efficiency as the cause.

203 The nineteen genes were compared to the nr/nt database using Blastn. Four returned no hits and a  
204 further four returned noninformative hits. A number of these genes had homologs known to be methylated  
205 in other animals (Table 2). Six of the eleven genes with informative hits have functions to do with social  
206 organisation in the social insects (Table 2).

207 We then looked at these nineteen genes in twenty-nine previously published RNA-seq libraries. Fifteen  
208 of these nineteen genes expressed a single allele in all twenty nine RNA-seq libraries, see supplement-  
209 ary table 2. The remaining four genes (AELG01000620.1, AELG01001021.1, AELG01002224.1a,  
210 AELG01002224.1b) were inconsistent; they showed expression of one allele in some *B. terrestris* workers,  
211 and expression of two alleles in other workers.

212 We then searched more generally for allele specific expression in the twenty-nine RNA-seq libraries.  
213 555 loci showed allele-specific expression in  $\geq 3$  of the 29 RNA-seq libraries (supplementary table 3).  
214 Comparing these loci against the *Bombus terrestris* genome using Blastn returned 211 hits. To search  
215 for gene ontology terms, we compared them against *Drosophila melanogaster* proteins, using Blastx,  
216 which returned 329 hits. One hundred and fifty-one Gene Ontology(GO) terms were enriched in the 555  
217 regions showing allele specific expression (Fisher's exact test  $p > 0.05$ ), however none were significant at  
218 the more stringent FDR  $> 0.05$ . Figure 1 shows the large number of biological functions associated with  
219 these 555 genes.

## 220 1 DISCUSSION

221 Of the nineteen genes displaying monoallelic methylation and monoallelic expression, fourteen had  
222 the hypermethylated (MeDIP) allele expressed, while five had the hypomethylated (MRE-seq) allele  
223 expressed (see supplementary table 1). In ant genes with allele specific methylation, the hypermethylated  
224 allele showed more expression than the hypomethylated allele (Bonasio et al., 2012). This fits with  
225 genome wide analysis that shows exonic methylation in insects associated with increased gene expression  
226 (Glastad et al., 2014; Yan et al., 2015). Our fourteen genes with the hypermethylated allele expressed  
227 agree with this pattern. But how to explain the five genes where the hypomethylated allele was expressed?  
228 Firstly, the role of methylation in insect gene expression is not clear cut, with the relationship between  
229 exonic methylation and expression often disappearing at the gene level (Yan et al., 2015). For example,  
230 *EGFR* expression is lower in ant workers that exhibit higher DNA methylation of *EGFR* (Alvarado et al.,  
231 2015). Secondly, even in the canonical mammalian methylation system, the "wrong" allele has been  
232 shown to be expressed occasionally due to lineage specific effects (Dean et al., 1998; Pardo-Manuel de  
233 Villena et al., 2000; Onyango et al., 2002; Sapienza, 2002; Zhang et al., 1993).

| Gene                                                            | Accession        | Expressed allele | Function                                                                                                                                                                                                                                                                                                                                                                                   |
|-----------------------------------------------------------------|------------------|------------------|--------------------------------------------------------------------------------------------------------------------------------------------------------------------------------------------------------------------------------------------------------------------------------------------------------------------------------------------------------------------------------------------|
| <i>yippee-like 1</i>                                            | AELG01001021.1   | MeDIP            | Yippee is an intracellular protein with a zinc-finger like domain. DNA methylation of a CpG island near the <i>yippee-like 3</i> promoter in humans represents a possible epigenetic mechanism leading to decreased gene expression in tumours (Kelley et al., 2010).                                                                                                                      |
| <i>slit homolog protein-like</i>                                | 2 AELG01000623.1 | MeDIP            | Slit is produced by midline glia in insects and is involved in cell projection during development (Rothberg et al., 1990). All three human Slits were found to be hypermethylated in hepatocellular carcinoma cell lines (Zheng et al., 2009).                                                                                                                                             |
| <i>methionine aminopeptidase 1-like</i>                         | AELG01000544.1   | MeDIP            | Methionine aminopeptidases catalyse N-terminal methionine removal (Leszczyniecka et al., 2006). MAP1D in humans was found to be potentially oncogenic (Leszczyniecka et al., 2006).                                                                                                                                                                                                        |
| <i>calmodulin-lysine N-methyltransferase-like</i>               | AELG01003672.1   | MRE              | Calmodulin-lysine N-methyltransferase catalyses the trimethylation of a lysine residue of calmodulin. Calmodulin is a ubiquitous, calcium-dependent, eukaryotic signalling protein with a large number of interactors. The methylation state of calmodulin causes phenotypic changes in growth and developmental processes (Magnani et al., 2010).                                         |
| <i>Ecdysone receptor</i>                                        | AELG01000543.1   | MRE              | In <i>Drosophila melanogaster</i> , ecdysone receptor interacts with ecdysone to activate a series of ecdysteroid genes (Takeuchi et al., 2007). In honeybees, <i>Ecdysone receptor</i> is expressed in the mushroom bodies of both workers and queens and ovaries of queens (Takeuchi et al., 2007).                                                                                      |
| <i>Shaker</i>                                                   | AELG01001021.1   | MeDIP            | Shaker is involved in the operation of potassium ion channel. <i>Shaker</i> expression was upregulated in sterile versus reproductive honeybee workers (Cardoen et al., 2011).                                                                                                                                                                                                             |
| <i>Centrosomal and chromosomal factor-like</i>                  | AELG01000977.1   | MeDIP            | Essential protein required for proper condensation of mitotic chromosomes and progression through mitosis. Expressed during oogenesis in <i>Drosophila</i> (Kodjabachian et al., 1998).                                                                                                                                                                                                    |
| <i>excitatory amino acid transporter 4-like</i>                 | AELG01000969.1   | MRE              | Excitatory amino acid transporters are neurotransmitter transporters. <i>Excitatory amino acid transporter 3</i> expression was upregulated in sterile honeybee workers (Cardoen et al., 2011). <i>Excitatory amino acid transporter 1</i> expression differences were also associated with worker - queen differentiation in the paper wasp <i>Polistes metricus</i> (Toth et al., 2014). |
| <i>elongation of very long chain fatty acids protein 6-like</i> | AELG01004467.1   | MeDIP            | The timing of the upregulation of fatty acid metabolism was found to be different in queen and worker honeybees (Li et al., 2010).                                                                                                                                                                                                                                                         |
| <i>ras GTPase-activating protein nGAP-like</i>                  | AELG01004618.1   | MeDIP            | <i>Ras GTPase-activating protein 1</i> was found to be upregulated in reproductive honeybee workers (Cardoen et al., 2011). It is involved in oocyte meiosis.                                                                                                                                                                                                                              |
| <i>bicaudal D-related protein homolog</i>                       | AELG01005399.1   | MeDIP            | Bicaudal is involved in embryonic pattern formation in <i>Drosophila</i> (Markesich et al., 2000). It is thought to be involved in the differentiation between soldiers and workers in the termite <i>Reticulitermes flavipes</i> (Scharf et al., 2003). <i>Bicaudal protein D</i> has been shown to be methylated more in eggs than sperm in honeybees (Drewell et al., 2014).            |

**Table 2.** The eleven of the nineteen monoallelically methylated and expressed genes that returned informative blast hits.

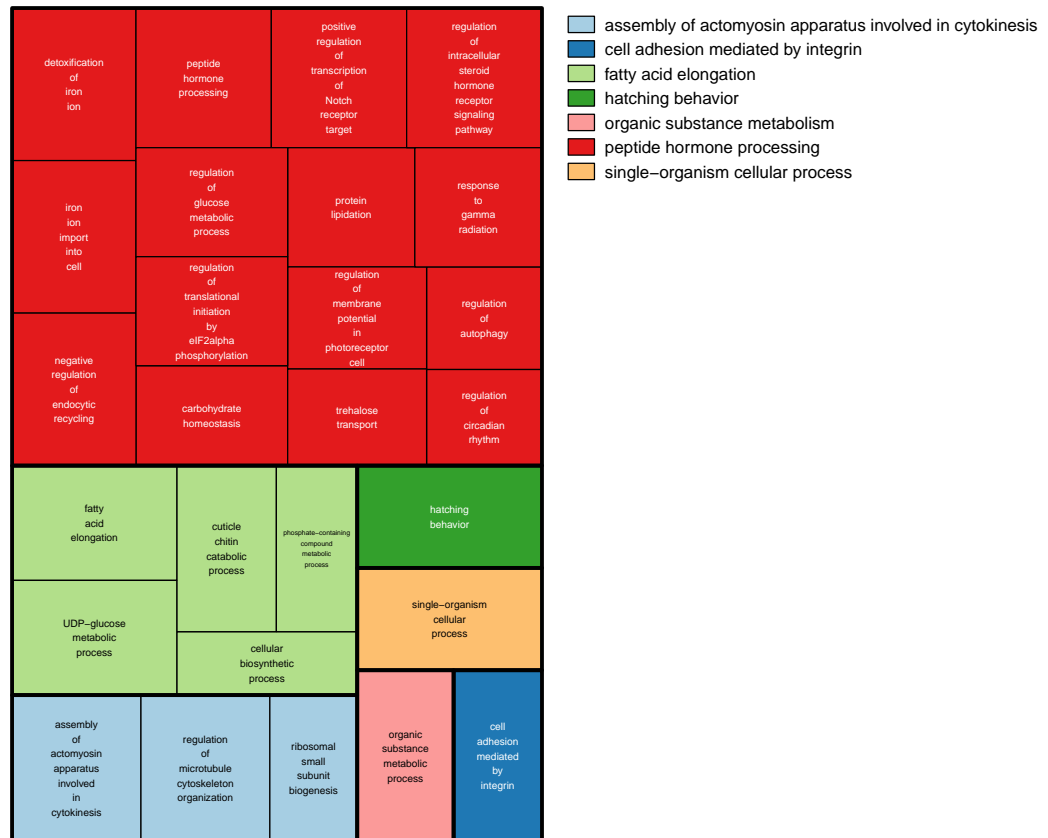

**Figure 1.** GO terms associated with allele specific expression. A summary of the enriched GO terms ( $p < 0.05$ , based on Blast2Go annotation) found for genes displaying allele specific expression. This figure was produced using Revigo.

234 We looked at the expression of these nineteen genes in all twenty-nine RNA-seq libraries. If they are  
235 monoallelically expressed in these bees, we would find only one allele in a given RNA-seq library. Fifteen  
236 of these nineteen genes were confirmed to show a single allele in all twenty-nine RNA-seq libraries. We  
237 would also find only one allele if that bee was homozygous. We cannot rule out that these fifteen genes  
238 just happen to be homozygous in all twenty-nine bees from five different colonies from multiple sources.

239 The remaining four genes showed inconsistent expression with one allele being expressed in some *B.*  
240 *terrestris* workers, and expression of two alleles in other workers. Natural intraspecific variation in allele  
241 specific expression has been found in other species (Pignatta et al., 2014). Another explanation is that  
242 these loci are not epigenetically controlled but rather their allele specific expression is derived from genetic  
243 effects (Remnant et al., 2016).

244 There are three main genetic, as opposed to epigenetic, affectors of allele specific expression (Edsgard  
245 et al., 2016). Allele specific expression can be caused by differences in the alleles' sequence within  
246 the translated part resulting in a modified protein. A change at the alleles' cis regulatory sites, could  
247 cause differential binding of transcription factors. Transcript processing can be affected by a change in  
248 the alleles' sequence a splice site or untranslated region. This large number of possible causes of allele  
249 specific expression could explain why we see so many functions associated with the 555 genes showing  
250 allele specific expression (Table 1).

251 But it is not just allele specific expression that may have genetic as well as epigenetic effects. It  
252 has been shown in humans that some allele specific methylation is determined by DNA sequence in cis  
253 and therefore shows Mendelian inheritance patterns (Meaburn et al., 2010). An extreme example of  
254 genetically controlled allele specific methylation is found in *Nasonia* wasps, where there is no evidence  
255 for methylation driven allele specific expression but inheritable cis-mediated allele specific methylation  
256 has been found (Wang et al., 2016). This cis-mediated methylation has recently been suggested as being  
257 important in social insect biology (Remnant et al., 2016; Wedd et al., 2016).

258 We have found that allele specific expression is widespread in the bumblebee. We have also found that  
259 the extreme version of allele specific expression, monoallelic expression is associated with monoallelic  
260 methylation. Genomic imprinting in mammals usually involves monoallelic methylation and expression.  
261 It is tempting to associate our results with genomic imprinting, especially as a number of the genes  
262 discovered are exactly the type predicted by theory to be imprinted (Queller, 2003). Caution however  
263 should be applied due to the lack of understanding of the functional role of methylation in gene expression  
264 in insects and in the as yet unquantified role of genetic cis effects in insect allele specific methylation and  
265 expression.

## 266 ACKNOWLEDGEMENTS

267 This work was financially supported by NERC grant no. NE/H010408/1 and NE/N010019/1 and NERC  
268 Biomolecular Analysis Facility research grants (NBAF 606 and 829) to EBM. Illumina library prepara-  
269 tion, sequencing and bioinformatics were carried out by Edinburgh Genomics, The University of  
270 Edinburgh. Edinburgh Genomics is partly supported through core grants from NERC (R8/H10/56), MRC  
271 (MR/K001744/1) and BBSRC (BB/J004243/1). ZNL would like to thank UK BBSRC for its financial  
272 support via MIBTP. The funders had no role in study design, data collection and analysis, decision to  
273 publish, or preparation of the manuscript.

## 274 SUPPORTING INFORMATION LEGENDS

275 **Table S1. Nineteen genes showing both monoallelic methylation and monoallelic expression.** Blast  
276 results and genomic coordinates of the reads from the RNA-seq, MRE-seq and MeDip-seq libraries.

277 **Table S2. Confirmation of single allele expression of nineteen monoallelically expressed genes in**  
278 **twenty-nine previously published transcriptomes.** For each of the 19 contigs are the previously  
279 published RNA-seq libraries with associated read counts.

280 **Table S3. 555 genes showing allele specific expression in at least three of the 29 previously pub-**  
281 **lished RNA-seq libraries.** This table details the blast results from both the bumblebee and  
282 drosophila genomes and the GO terms associated with the drosophila hits.

283 **Figure S1. Biological coefficient of variation (BCV) of a) raw data, and b) SVA-adjusted data for**  
284 **the 29 RNA-seq *Bombus terrestris* libraries**



## 285 ETHICAL DECLARATION

286 The protocol reported here conforms to the regulatory requirements for animal experimentation in the  
287 United Kingdom.

## 288 REFERENCES

- 289 Altschul, S. F., Madden, T. L., Schaffer, A. A., Zhang, J. H., Zhang, Z., Miller, W., and Lipman, D. J.  
290 (1997). Gapped BLAST and PSI-BLAST: a new generation of protein database search programs.  
291 *Nucleic Acids Research*, 25:3389–3402. 17.
- 292 Alvarado, S., Rajakumar, R., Abouheif, E., and Szyf, M. (2015). Epigenetic variation in the Egfr gene  
293 generates quantitative variation in a complex trait in ants. *Nat Commun*, 6.
- 294 Amarasinghe, H., Toghiani, B., Nathanael, D., and Mallon, E. B. (2015). Allele specific expression in  
295 worker reproduction genes in the bumblebee *Bombus terrestris*. *PeerJ*, 3:e1079.
- 296 Amarasinghe, H. E., Clayton, C. I., and Mallon, E. B. (2014). Methylation and worker reproduction  
297 in the bumble-bee (*Bombus terrestris*). *Proceedings of the Royal Society B: Biological Sciences*,  
298 281(1780):20132502.
- 299 Bird, A. (2002). DNA methylation patterns and epigenetic memory. *Genes & Development*, 16(1):6–21.
- 300 Bonasio, R., Li, Q., Lian, J., Mutti, N. S., Jin, L., Zhao, H., Zhang, P., Wen, P., Xiang, H., Ding, Y., Jin,  
301 Z., Shen, S. S., Wang, Z., Wang, W., Wang, J., Berger, S. L., Liebig, J., Zhang, G., and Reinberg, D.  
302 (2012). Genome-wide and Caste-Specific DNA Methylomes of the Ants *Camponotus floridanus* and  
303 *Harpegnathos saltator*. *Current Biology*, 22(19):1755–1764.
- 304 Cardoen, D., Wenseleers, T., Ernst, U. R., Danneels, E. L., Laget, D., DE Graaf, D. C., Schoofs, L., and  
305 Verleyen, P. (2011). Genome-wide analysis of alternative reproductive phenotypes in honeybee workers.  
306 *Molecular Ecology*, 20(19):4070–4084.
- 307 Chittka, A., Wurm, Y., and Chittka, L. (2012). Epigenetics: The making of ant castes. *Current Biology*,  
308 22(19):R835–R838.
- 309 Danecek, P., Auton, A., Abecasis, G., Albers, C. A., Banks, E., DePristo, M. A., Handsaker, R. E.,  
310 Lunter, G., Marth, G. T., Sherry, S. T., McVean, G., and Durbin, R. (2011). The variant call format and  
311 VCFtools. *Bioinformatics*, 27(15):2156–2158.
- 312 Dean, W., Bowden, L., Aitchison, A., Klose, J., Moore, T., Meneses, J. J., Reik, W., and Feil, R. (1998).  
313 Altered imprinted gene methylation and expression in completely ES cell-derived mouse fetuses:  
314 association with aberrant phenotypes. *Development (Cambridge, England)*, 125(12):2273–2282.
- 315 DePristo, M. A., Banks, E., Poplin, R., Garimella, K. V., Maguire, J. R., Hartl, C., Philippakis, A. A., del  
316 Angel, G., Rivas, M. A., Hanna, M., McKenna, A., Fennell, T. J., Kernytsky, A. M., Sivachenko, A. Y.,  
317 Cibulskis, K., Gabriel, S. B., Altshuler, D., and Daly, M. J. (2011). A framework for variation discovery  
318 and genotyping using next-generation DNA sequencing data. *Nature Genetics*, 43(5):491–498.
- 319 Drewell, R. A., Bush, E. C., Remnant, E. J., Wong, G. T., Beeler, S. M., Stringham, J. L., Lim, J., and  
320 Oldroyd, B. P. (2014). The dynamic DNA methylation cycle from egg to sperm in the honey bee *Apis*  
321 *mellifera*. *Development*, 141(13):2702–2711.
- 322 Edsgard, D., Iglesias, M. J., Reilly, S.-J., Hamsten, A., Tornvall, P., Odeberg, J., and Emanuelsson,  
323 O. (2016). GeneiASE: Detection of condition-dependent and static allele-specific expression from  
324 RNA-seq data without haplotype information. *Scientific Reports*, 6:21134.
- 325 Farh, K. K.-H., Grimson, A., Jan, C., Lewis, B. P., Johnston, W. K., Lim, L. P., Burge, C. B., and Bartel,  
326 D. P. (2005). The widespread impact of mammalian MicroRNAs on mRNA repression and evolution.  
327 *Science (New York, N.Y.)*, 310(5755):1817–1821.
- 328 Galbraith, D. A., Kocher, S. D., Glenn, T., Albert, I., Hunt, G. J., Strassmann, J. E., Queller, D. C., and  
329 Grozinger, C. M. (2016). Testing the kinship theory of intragenomic conflict in honey bees (*Apis*  
330 *mellifera*). *Proceedings of the National Academy of Sciences*, page 201516636.
- 331 Gineikiene, E., Stoskus, M., and Griskevicius, L. (2009). Single Nucleotide Polymorphism-Based System  
332 Improves the Applicability of Quantitative PCR for Chimerism Monitoring. *The Journal of Molecular*  
333 *Diagnostics : JMD*, 11(1):66–74.
- 334 Glastad, K. M., Hunt, B. G., and Goodisman, M. A. (2014). Evolutionary insights into DNA methylation  
335 in insects. *Current Opinion in Insect Science*, 1:25–30.
- 336 Glastad, K. M., Hunt, B. G., Yi, S. V., and Goodisman, M. a. D. (2011). DNA methylation in insects: on  
337 the brink of the epigenomic era. *Insect Molecular Biology*, 20(5):553–565.

- 338 Goldberg, A., Allis, C., and Bernstein, E. (2007). Epigenetics: A Landscape Takes Shape. *Cell*,  
339 128(4):635–638.
- 340 Gotz, S., García-Gómez, J. M., Terol, J., Williams, T. D., Nagaraj, S. H., Nueda, M. J., Robles, M., Talón,  
341 M., Dopazo, J., and Conesa, A. (2008). High-throughput functional annotation and data mining with  
342 the Blast2go suite. *Nucleic Acids Research*, 36(10):3420–3435.
- 343 Harris, R. A., Wang, T., Coarfa, C., Nagarajan, R. P., Hong, C., Downey, S. L., Johnson, B. E., Fouse,  
344 S. D., Delaney, A., Zhao, Y., Olshen, A., Ballinger, T., Zhou, X., Forsberg, K. J., Gu, J., Echipare, L.,  
345 O’Geen, H., Lister, R., Pelizzola, M., Xi, Y., Epstein, C. B., Bernstein, B. E., Hawkins, R. D., Ren, B.,  
346 Chung, W.-Y., Gu, H., Bock, C., Gnirke, A., Zhang, M. Q., Haussler, D., Ecker, J. R., Li, W., Farnham,  
347 P. J., Waterland, R. A., Meissner, A., Marra, M. A., Hirst, M., Milosavljevic, A., and Costello, J. F.  
348 (2010). Comparison of sequencing-based methods to profile DNA methylation and identification of  
349 monoallelic epigenetic modifications. *Nature biotechnology*, 28(10):1097–1105.
- 350 Harrison, M. C., Hammond, R. L., and Mallon, E. B. (2015). Reproductive workers show queen-like  
351 gene expression in an intermediately eusocial insect, the buff-tailed bumble bee *Bombus terrestris*.  
352 *Molecular Ecology*, 24:121–129.
- 353 Harvey, C. T., Moyerbrailean, G. A., Davis, G. O., Wen, X., Luca, F., and Pique-Regi, R. (2014). QuASAR:  
354 Quantitative Allele Specific Analysis of Reads. *Bioinformatics*, page btu802.
- 355 Johnson, W. E., Li, C., and Rabinovic, A. (2007). Adjusting batch effects in microarray expression data  
356 using empirical Bayes methods. *Biostatistics*, 8(1):118–127.
- 357 Kelley, K., Miller, K. R., Todd, A., Kelley, A., Tuttle, R., and Berberich, S. J. (2010). YPEL3, a  
358 p53-regulated gene that induces cellular senescence. *Cancer research*, 70(9):3566–3575.
- 359 Kim, D., Pertea, G., Trapnell, C., Pimentel, H., Kelley, R., and Salzberg, S. L. (2013). TopHat2: accurate  
360 alignment of transcriptomes in the presence of insertions, deletions and gene fusions. *Genome Biology*,  
361 14(4):R36.
- 362 Kocher, S. D., Tsuruda, J. M., Gibson, J. D., Emore, C. M., Arechavaleta-Velasco, M. E., Queller, D. C.,  
363 Strassmann, J. E., Grozinger, C. M., Gribskov, M. R., San Miguel, P., Westerman, R., and Hunt, G. J.  
364 (2015). A Search for Parent-of-Origin Effects on Honey Bee Gene Expression. *G3 (Bethesda, Md.)*.
- 365 Kodjabachian, L., Delaage, M., Maurel, C., Miassod, R., Jacq, B., and Rosset, R. (1998). Mutations in  
366 ccf, a novel *Drosophila* gene encoding a chromosomal factor, affect progression through mitosis and  
367 interact with Pc-G mutations. *The EMBO Journal*, 17(4):1063–1075.
- 368 Leek, J. T., Johnson, W. E., Parker, H. S., Jaffe, A. E., and Storey, J. D. (2012). The sva package for  
369 removing batch effects and other unwanted variation in high-throughput experiments. *Bioinformatics*,  
370 28(6):882–883.
- 371 Leszczyniecka, M., Bhatia, U., Cueto, M., Nirmala, N. R., Towbin, H., Vattay, A., Wang, B., Zabludoff, S.,  
372 and Phillips, P. E. (2006). MAP1d, a novel methionine aminopeptidase family member is overexpressed  
373 in colon cancer. *Oncogene*, 25(24):3471–3478.
- 374 Li, H. and Durbin, R. (2009). Fast and accurate short read alignment with Burrows-Wheeler transform.  
375 *Bioinformatics (Oxford, England)*, 25(14):1754–1760.
- 376 Li, H., Handsaker, B., Wysoker, A., Fennell, T., Ruan, J., Homer, N., Marth, G., Abecasis, G., Durbin, R.,  
377 and 1000 Genome Project Data Processing Subgroup (2009). The Sequence Alignment/Map format  
378 and SAMtools. *Bioinformatics (Oxford, England)*, 25(16):2078–2079.
- 379 Li, J., Wu, J., Begna Rundassa, D., Song, F., Zheng, A., and Fang, Y. (2010). Differential Protein  
380 Expression in Honeybee (*Apis mellifera* L.) Larvae: Underlying Caste Differentiation. *PLoS ONE*,  
381 5(10):e13455.
- 382 Liu, W. and Saint, D. A. (2002). A New Quantitative Method of Real Time Reverse Transcription  
383 Polymerase Chain Reaction Assay Based on Simulation of Polymerase Chain Reaction Kinetics.  
384 *Analytical Biochemistry*, 302(1):52–59.
- 385 Magnani, R., Dirk, L. M. A., Trievel, R. C., and Houtz, R. L. (2010). Calmodulin methyltransferase is an  
386 evolutionarily conserved enzyme that trimethylates Lys-115 in calmodulin. *Nature Communications*,  
387 1:43.
- 388 Markesich, D. C., Gajewski, K. M., Nazimiec, M. E., and Beckingham, K. (2000). bicaudal encodes the  
389 *Drosophila* beta NAC homolog, a component of the ribosomal translational machinery\*. *Development*  
390 *(Cambridge, England)*, 127(3):559–572.
- 391 McCarthy, D. J., Chen, Y., and Smyth, G. K. (2012). Differential expression analysis of multifactor  
392 RNA-Seq experiments with respect to biological variation. *Nucleic Acids Research*, 40(10):4288–4297.

- 393 McKenna, A., Hanna, M., Banks, E., Sivachenko, A., Cibulskis, K., Kernytsky, A., Garimella, K.,  
394 Altshuler, D., Gabriel, S., Daly, M., and DePristo, M. A. (2010). The Genome Analysis Toolkit:  
395 A MapReduce framework for analyzing next-generation DNA sequencing data. *Genome Research*,  
396 20(9):1297–1303.
- 397 Meaburn, E. L., Schalkwyk, L. C., and Mill, J. (2010). Allele-specific methylation in the human genome:  
398 implications for genetic studies of complex disease. *Epigenetics*, 5(7):578–582.
- 399 Onyango, P., Jiang, S., Uejima, H., Shablott, M. J., Gearhart, J. D., Cui, H., and Feinberg, A. P. (2002).  
400 Monoallelic expression and methylation of imprinted genes in human and mouse embryonic germ  
401 cell lineages. *Proceedings of the National Academy of Sciences of the United States of America*,  
402 99(16):10599–10604.
- 403 Palacios, R., Gazave, E., Goñi, J., Piedrafita, G., Fernando, O., Navarro, A., and Villoslada, P. (2009).  
404 Allele-Specific Gene Expression Is Widespread Across the Genome and Biological Processes. *PLoS*  
405 *ONE*, 4(1):e4150.
- 406 Pardo-Manuel de Villena, F., de la Casa-Esperón, E., and Sapienza, C. (2000). Natural selection and the  
407 function of genome imprinting: beyond the silenced minority. *Trends in genetics: TIG*, 16(12):573–579.
- 408 Pfaffl, M. W. (2001). A new mathematical model for relative quantification in real-time RT-PCR. *Nucleic*  
409 *Acids Research*, 29(9):e45–e45.
- 410 Pignatta, D., Erdmann, R. M., Scheer, E., Picard, C. L., Bell, G. W., and Gehring, M. (2014). Natu-  
411 ral epigenetic polymorphisms lead to intraspecific variation in Arabidopsis gene imprinting. *eLife*,  
412 3:e03198.
- 413 Queller, D. C. (2003). Theory of genomic imprinting conflict in social insects. *Bmc Evolutionary Biology*,  
414 3:art. no.–15.
- 415 Quinlan, A. R. and Hall, I. M. (2010). BEDTools: a flexible suite of utilities for comparing genomic  
416 features. *Bioinformatics (Oxford, England)*, 26(6):841–842.
- 417 Reik, W. and Walter, J. (2001). Genomic imprinting: Parental influence on the genome. *Nature Reviews*  
418 *Genetics*, 2:21–32. 1.
- 419 Remnant, E. J., Ashe, A., Young, P. E., Buchmann, G., Beekman, M., Allsopp, M. H., Suter, C. M.,  
420 Drewell, R. A., and Oldroyd, B. P. (2016). Parent-of-origin effects on genome-wide DNA methylation  
421 in the Cape honey bee (*Apis mellifera capensis*) may be confounded by allele-specific methylation.  
422 *BMC Genomics*, 17(1).
- 423 Riddell, C. E., Garces, J. D. L., Adams, S., Barribeau, S. M., Twell, D., and Mallon, E. B. (2014).  
424 Differential gene expression and alternative splicing in insect immune specificity. *BMC Genomics*,  
425 15(1):1031.
- 426 Robinson, M. D., McCarthy, D. J., and Smyth, G. K. (2010). edgeR: a Bioconductor package for  
427 differential expression analysis of digital gene expression data. *Bioinformatics*, 26(1):139–140.
- 428 Rothberg, J. M., Jacobs, J. R., Goodman, C. S., and Artavanis-Tsakonas, S. (1990). slit: an extracellular  
429 protein necessary for development of midline glia and commissural axon pathways contains both EGF  
430 and LRR domains. *Genes & Development*, 4(12a):2169–2187.
- 431 Sadd, B. M., Barribeau, S. M., Bloch, G., Graaf, D. C. d., Dearden, P., Elsik, C. G., Gadau, J., Grimme-  
432 likhuijzen, C. J., Hasselmann, M., Lozier, J. D., Robertson, H. M., Smaghe, G., Stolle, E., Vaerenbergh,  
433 M. V., Waterhouse, R. M., Bornberg-Bauer, E., Klasberg, S., Bennett, A. K., Câmara, F., Guigó, R.,  
434 Hoff, K., Mariotti, M., Munoz-Torres, M., Murphy, T., Santesmasses, D., Amdam, G. V., Beckers, M.,  
435 Beye, M., Biewer, M., Bitondi, M. M., Blaxter, M. L., Bourke, A. F., Brown, M. J., Buechel, S. D.,  
436 Cameron, R., Cappelle, K., Carolan, J. C., Christiaens, O., Ciborowski, K. L., Clarke, D. F., Colgan,  
437 T. J., Collins, D. H., Cridge, A. G., Dalmay, T., Dreier, S., Plessis, L. d., Duncan, E., Erler, S., Evans, J.,  
438 Falcon, T., Flores, K., Freitas, F. C., Fuchikawa, T., Gempe, T., Hartfelder, K., Hauser, F., Helbing, S.,  
439 Humann, F. C., Irvine, F., Jermiin, L. S., Johnson, C. E., Johnson, R. M., Jones, A. K., Kadowaki, T.,  
440 Kidner, J. H., Koch, V., Köhler, A., Kraus, F. B., Lattorff, H. M., Leask, M., Lockett, G. A., Mallon,  
441 E. B., Antonio, D. S. M., Marxer, M., Meeus, I., Moritz, R. F., Nair, A., Nöpflin, K., Nissen, I., Niu,  
442 J., Nunes, F. M., Oakeshott, J. G., Osborne, A., Otte, M., Pinheiro, D. G., Rossié, N., Rueppell, O.,  
443 Santos, C. G., Schmid-Hempel, R., Schmitt, B. D., Schulte, C., Simões, Z. L., Soares, M. P., Swevers,  
444 L., Winnebeck, E. C., Wolschin, F., Yu, N., Zdobnov, E. M., Aqrabi, P. K., Blankenburg, K. P., Coyle,  
445 M., Francisco, L., Hernandez, A. G., Holder, M., Hudson, M. E., Jackson, L., Jayaseelan, J., Joshi, V.,  
446 Kovar, C., Lee, S. L., Mata, R., Mathew, T., Newsham, I. F., Ngo, R., Okwuonu, G., Pham, C., Pu,  
447 L.-L., Saada, N., Santibanez, J., Simmons, D., Thornton, R., Venkat, A., Walden, K. K., Wu, Y.-Q.,

- 448 Debyser, G., Devreese, B., Asher, C., Blommaert, J., Chipman, A. D., Chittka, L., Fouks, B., Liu, J.,  
449 O'Neill, M. P., Sumner, S., Puiu, D., Qu, J., Salzberg, S. L., Scherer, S. E., Muzny, D. M., Richards, S.,  
450 Robinson, G. E., Gibbs, R. A., Schmid-Hempel, P., and Worley, K. C. (2015). The genomes of two key  
451 bumblebee species with primitive eusocial organization. *Genome Biology*, 16(1):76.
- 452 Sapienza, C. (2002). Imprinted gene expression, transplantation medicine, and the “other” human  
453 embryonic stem cell. *Proceedings of the National Academy of Sciences of the United States of America*,  
454 99(16):10243–10245.
- 455 Scharf, M. E., Wu-Scharf, D., Pittendrigh, B. R., and Bennett, G. W. (2003). Caste and development-  
456 associated gene expression in a lower termite. *Genome Biology*, 4(10):R62.
- 457 Supek, F., Bošnjak, M., Škunca, N., and Šmuc, T. (2011). REVIGO Summarizes and Visualizes Long  
458 Lists of Gene Ontology Terms. *PLoS ONE*, 6(7):e21800.
- 459 Takeuchi, H., Paul, R. K., Matsuzaka, E., and Kubo, T. (2007). EcR-A expression in the brain and ovary  
460 of the honeybee (*Apis mellifera* L.). *Zoological Science*, 24(6):596–603.
- 461 Team, R.-C. (2015). R: A language and environment for statistical computing.
- 462 Toth, A. L., Tooker, J. F., Radhakrishnan, S., Minard, R., Henshaw, M. T., and Grozinger, C. M.  
463 (2014). Shared genes related to aggression, rather than chemical communication, are associated with  
464 reproductive dominance in paper wasps (*Polistes metricus*). *BMC Genomics*, 15(1):75.
- 465 Wang, X., Werren, J. H., and Clark, A. G. (2016). Allele-Specific Transcriptome and Methylome  
466 Analysis Reveals Stable Inheritance and Cis-Regulation of DNA Methylation in *Nasonia*. *PLOS Biol*,  
467 14(7):e1002500.
- 468 Wedd, L., Kucharski, R., and Maleszka, R. (2016). Differentially methylated obligatory epialleles  
469 modulate context-dependent LAM gene expression in the honeybee *Apis mellifera*. *Epigenetics*,  
470 11(1):1–10.
- 471 Weiner, S. A. and Toth, A. L. (2012). Epigenetics in social insects: a new direction for understanding the  
472 evolution of castes. *Genetics research international*, 2012:609810.
- 473 Welch, M. and Lister, R. (2014). Epigenomics and the control of fate, form and function in social insects.  
474 *Current Opinion in Insect Science*, 1:31–38.
- 475 Yan, H., Bonasio, R., Simola, D. F., Liebig, J., Berger, S. L., and Reinberg, D. (2015). DNA Methylation in  
476 Social Insects: How Epigenetics Can Control Behavior and Longevity. *Annual Review of Entomology*,  
477 60(1):435–452.
- 478 Yan, H., Simola, D. F., Bonasio, R., Liebig, J., Berger, S. L., and Reinberg, D. (2014). Eusocial insects as  
479 emerging models for behavioural epigenetics. *Nature Reviews Genetics*, 15(10):677–688.
- 480 Zhang, Y., Shields, T., Crenshaw, T., Hao, Y., Moulton, T., and Tycko, B. (1993). Imprinting of human  
481 H19: allele-specific CpG methylation, loss of the active allele in Wilms tumor, and potential for somatic  
482 allele switching. *American Journal of Human Genetics*, 53(1):113–124.
- 483 Zheng, D., Liu, B.-B., Liu, Y.-K., Kang, X.-N., Sun, L., Guo, K., Sun, R.-X., Chen, J., and Zhao, Y.  
484 (2009). Analysis of the expression of Slit/Robo genes and the methylation status of their promoters in  
485 the hepatocellular carcinoma cell lines. *Zhonghua Gan Zang Bing Za Zhi = Zhonghua Ganzangbing*  
486 *Zazhi = Chinese Journal of Hepatology*, 17(3):198–202.
